# Supplementary material for: Reversible hierarchical structure induced by solvation and temperature modulation in an ionic liquid-based random bottlebrush copolymer
Source: Royal Society of Chemistry journal article supplement (doi:10.1039/c8py01218k), 2018-01-01
Supplement: c8py01218k1.pdf [file c8py01218k1.pdf]

## Supporting Information

### Reversible hierarchical structure induced by solvation and temperature modulation in an ionic liquid-based random bottlebrush copolymer

Harsha D. Magurudeniya<sup>1</sup>, Bryan S. Ringstrand<sup>1</sup>, Sönke Seifert<sup>2</sup>, and Millicent A. Firestone<sup>1\*</sup>

<sup>1</sup>Materials Physics & Applications Division, Los Alamos National Laboratory, Los Alamos, NM USA 87545

<sup>2</sup>X-ray Sciences Division, Argonne National Laboratory, Lemont, IL USA 60439

(\*) Author to whom correspondence should be addressed:

Millicent A. Firestone

Materials Physics & Applications

Los Alamos National Laboratory

P.O. Box 1663

Los Alamos, NM 87545

Phone: 505-695-8837; E-mail: [firestone@lanl.gov](mailto:firestone@lanl.gov)

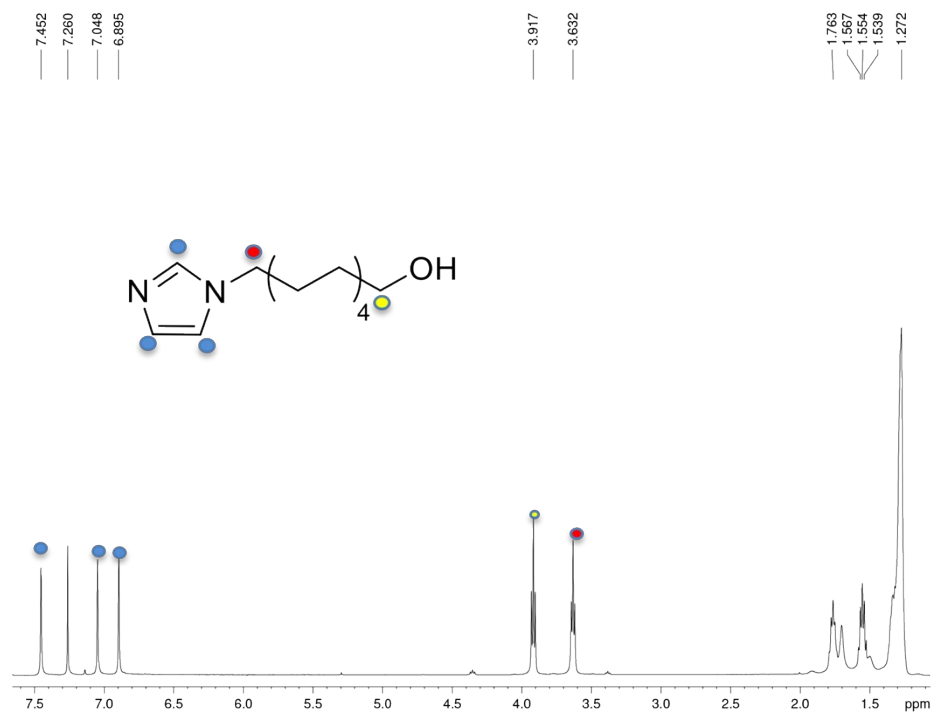

Figure S1. <sup>1</sup>H NMR of 1-[10-(hydroxydecyl)]imidazole (2)

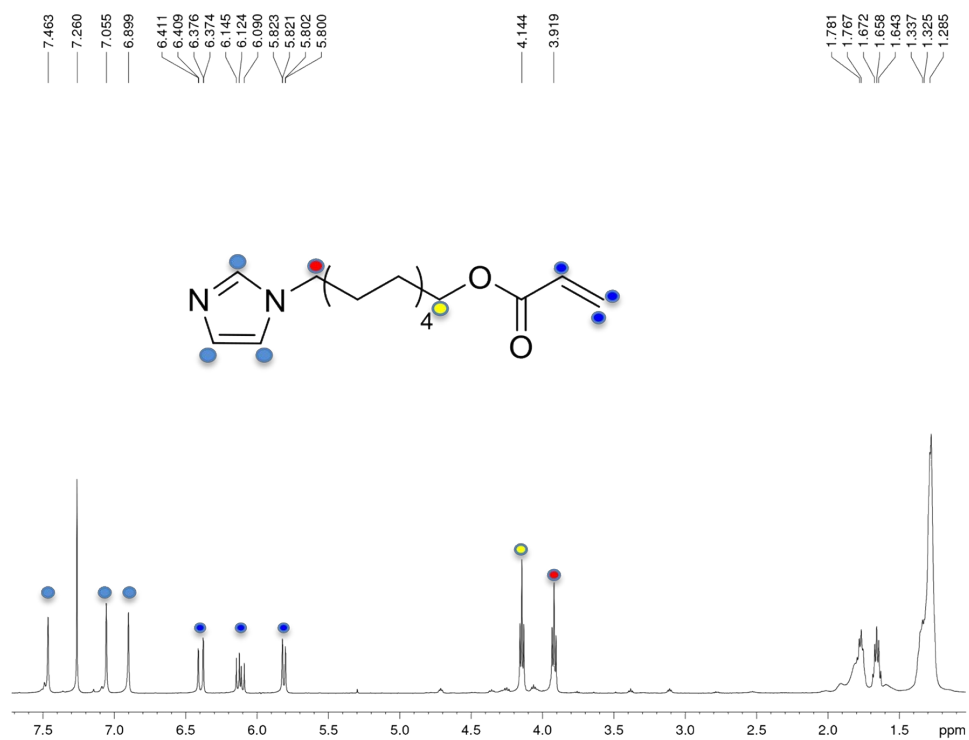

Figure S2.  $^1\text{H}$  NMR of 1-(10-(acryloyloxy)decyl)imidazole (3)

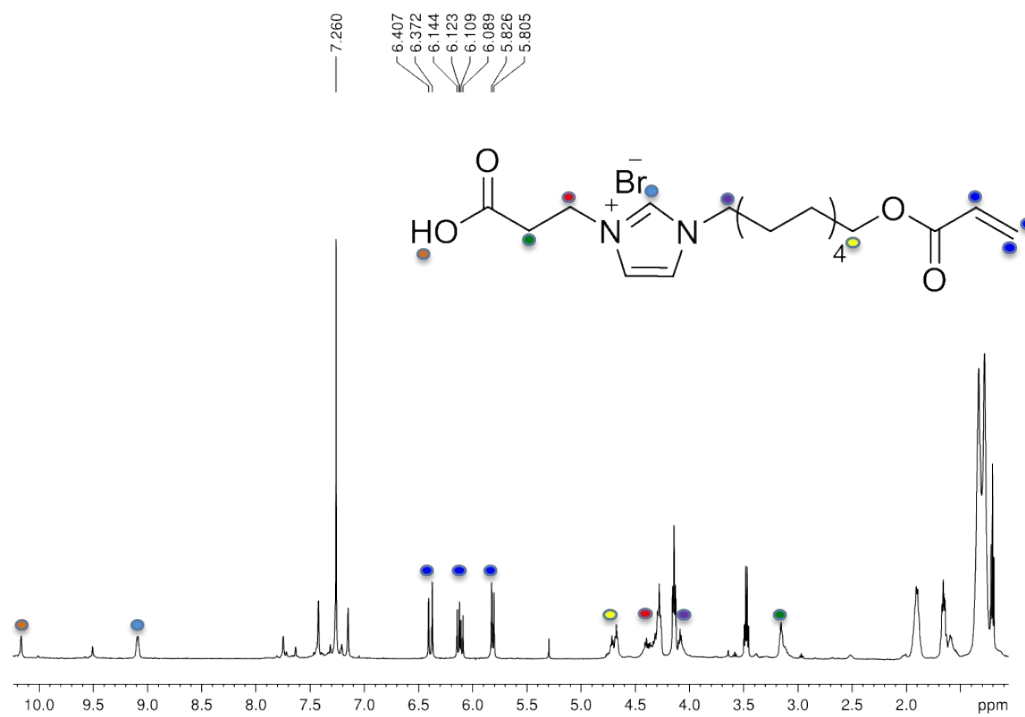

Figure S3. <sup>1</sup>H NMR of 1-(10-(acryloyloxy)decyl)-3-(2-carboxyethyl)imidazolium bromide (4)

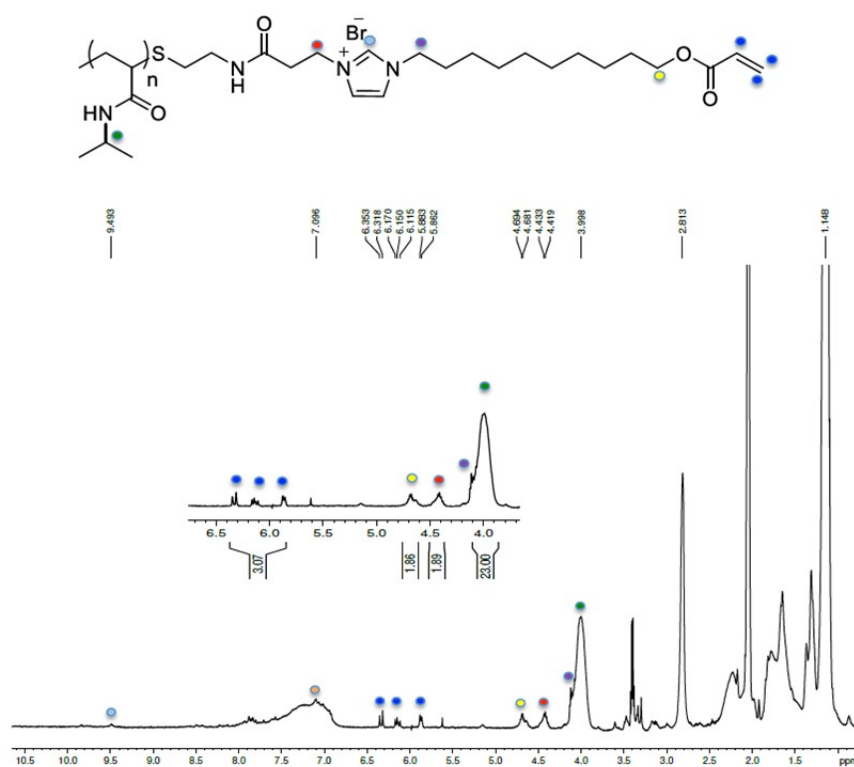

**Figure S4.** <sup>1</sup>H NMR of 1-(10-(acryloyloxy)decyl)-3-(2-carboxyethyl)imidazolium bromide-PNIPAM Conjugate (5)

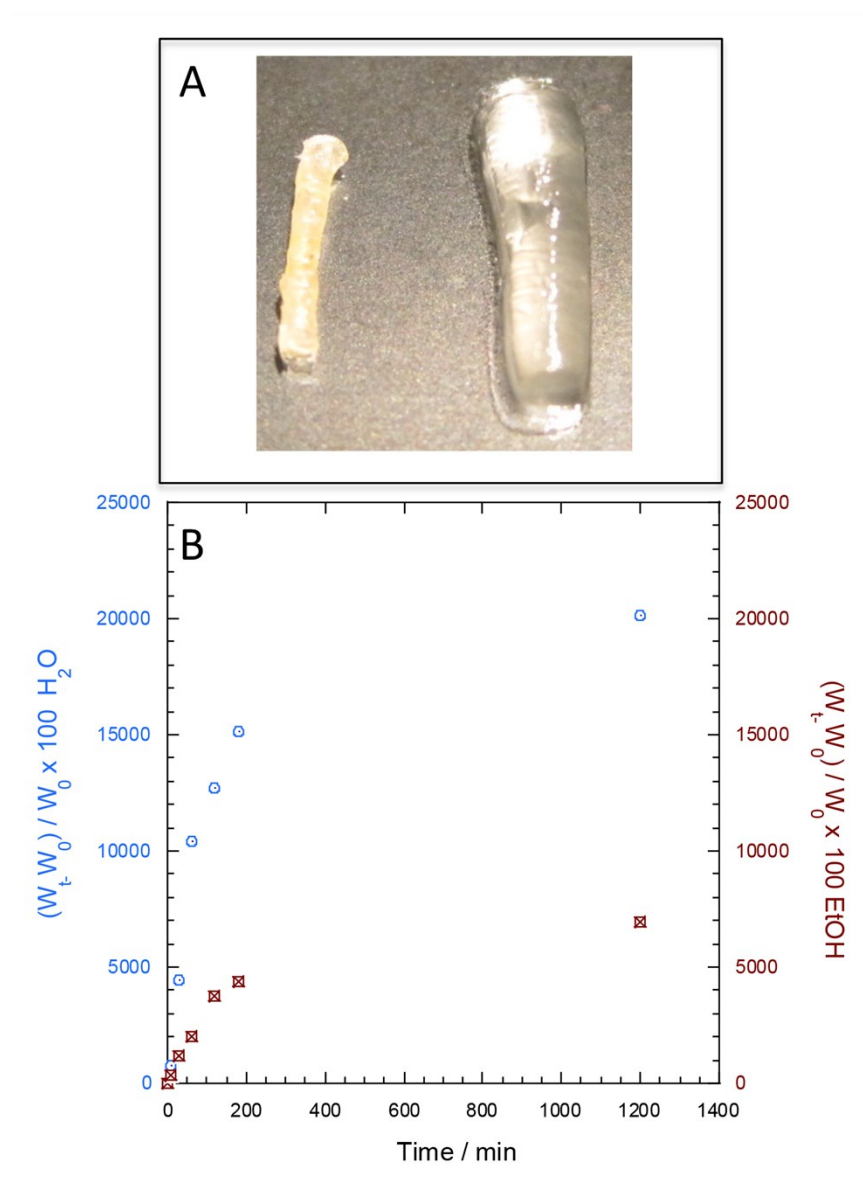

**Figure S5.** Weight ratios as a function of time during water (blue) and ethanol (red) swelling of poly{(1-(10-(acryloyloxy)decyl)-3-(2-carboxyethyl)imidazolium bromide-graft-PNIPAM)-co-1-(10-(acryloyloxy)decyl)-3-methylimidazolium chloride}

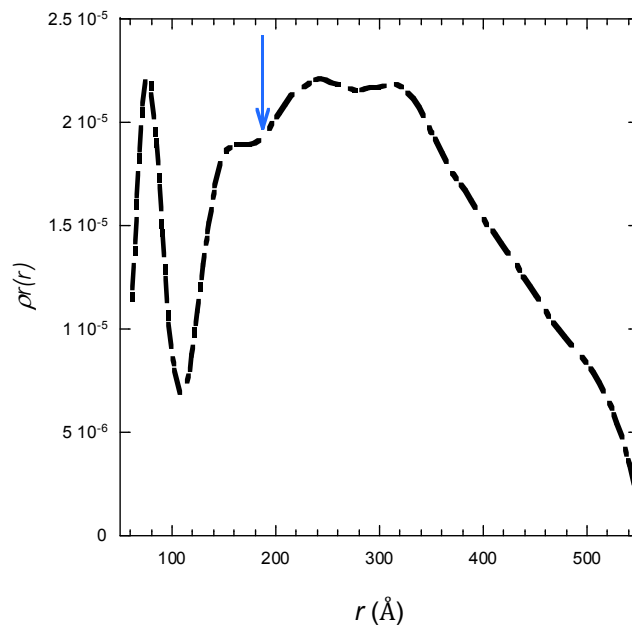

**Figure S6A.** Pair distance distribution function, PDDF determined for water swollen poly[[C<sub>1</sub>COOHAcrc<sub>10</sub>IM]<sup>+</sup>[Br]<sup>-</sup> PNIPAM<sub>23</sub>]-co-[AcrC<sub>10</sub>mim<sup>+</sup>][Cl<sup>-</sup>] at 10 °C. The profile deviates from the bell-shaped curve, skewed towards long distances signaling a disk shape particle shape. The large oscillation at short distances is attributed to the high contrast between particle exterior – interior. The blue arrow indicates approximate disk thickness. Orange arrow gives estimation of particle size.

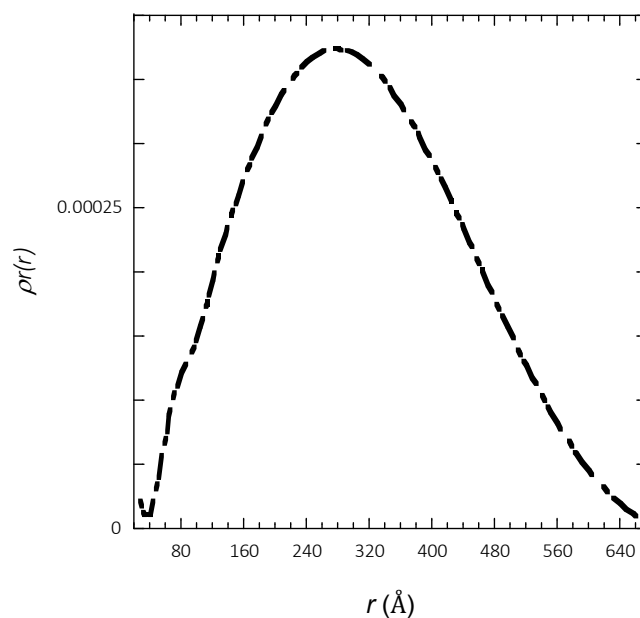

**Figure S6B.** Pair distance distribution function, PDDF determined for water swollen poly[[C<sub>1</sub>COOHAcrc<sub>10</sub>IM]<sup>+</sup>[Br]<sup>-</sup> PNIPAM<sub>23</sub>]-co-[AcrC<sub>10</sub>mim<sup>+</sup>][Cl<sup>-</sup>] at 50 °C. The profile deviates from the bell-shaped curve, skewed towards long distances signaling a disk shape particle shape.
